# Supplementary material for: A bifunctional nanoporous Ni–Co–Se electrocatalyst with a superaerophobic surface for water and hydrazine oxidation
Source: Royal Society of Chemistry journal article supplement (doi:10.1039/c9nr09959j), 2020-01-01
Supplement: c9nr09959j1.pdf [file c9nr09959j1.pdf]

# Supporting Information

## **Bifunctional nanoporous Ni-Co-Se electrocatalyst with superaerophobic surface for the water and hydrazine oxidation**

Zhongbao Feng<sup>a,b\*</sup>, Enping Wang<sup>a</sup>, Shuai Huang<sup>a</sup>, Jiming Liu<sup>a</sup>

*<sup>a</sup>School of Metallurgy, Northeastern University, Shenyang, Liaoning 110819, PR China*

*<sup>b</sup>State key laboratory of rolling and automation, Northeastern University, Shenyang, 110819, P. R.*

*China.*

---

\* Corresponding author. E-mail addresses: fengzb@smm.neu.edu.cn (Z. Feng)

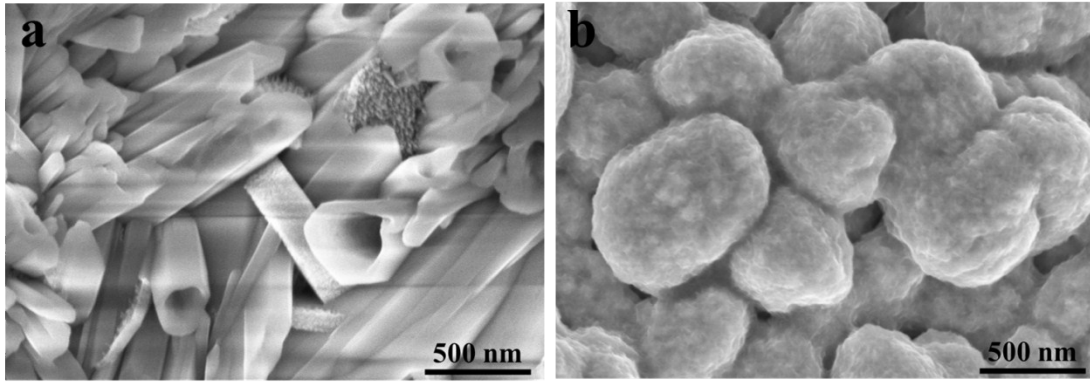

Fig. S1 SEM images of a) CoSe<sub>2</sub> and b) NiSe<sub>2</sub>

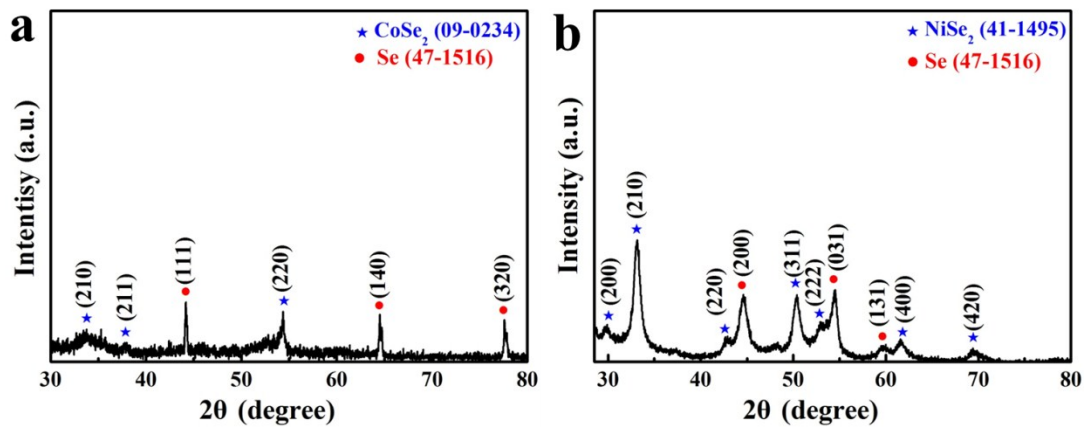

Fig. S2 XRD patterns of a) CoSe<sub>2</sub> and b) NiSe<sub>2</sub>

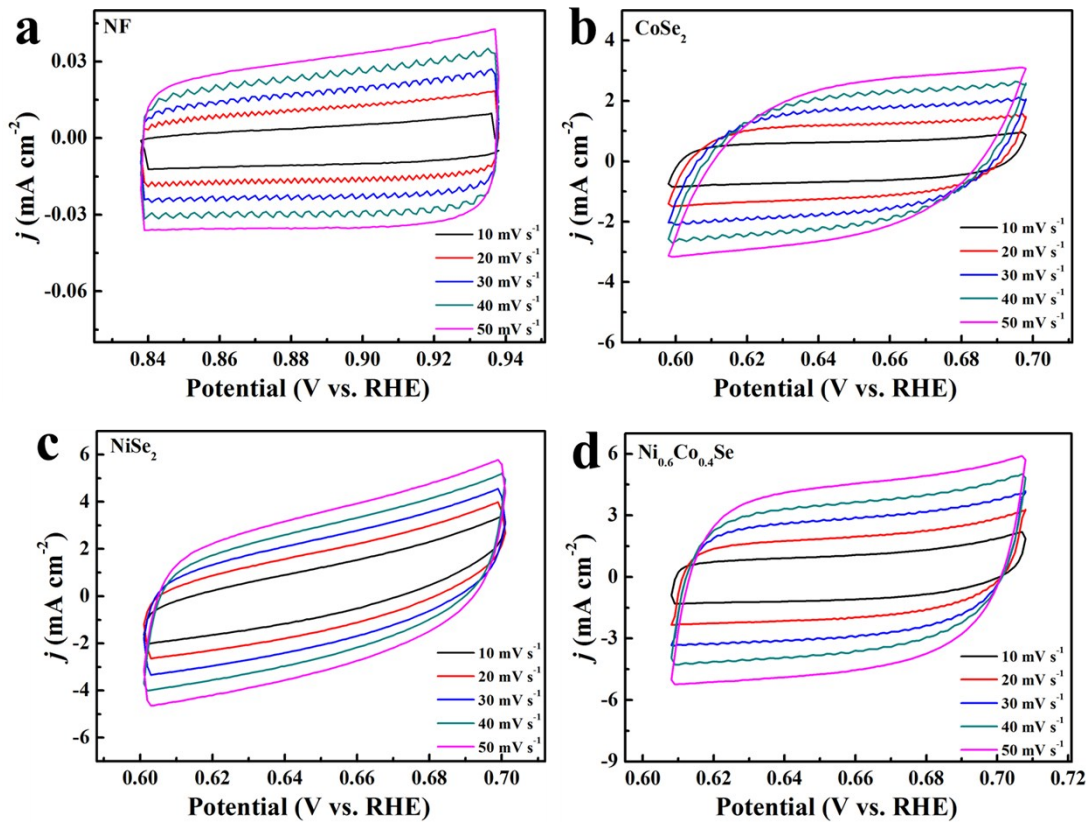

**Fig. S3** CV curves of **a)** NF, **b)** CoSe<sub>2</sub>, **c)** NiSe<sub>2</sub> and **d)** Ni<sub>0.6</sub>Co<sub>0.4</sub>Se in the capacitance current range at various scan rates.

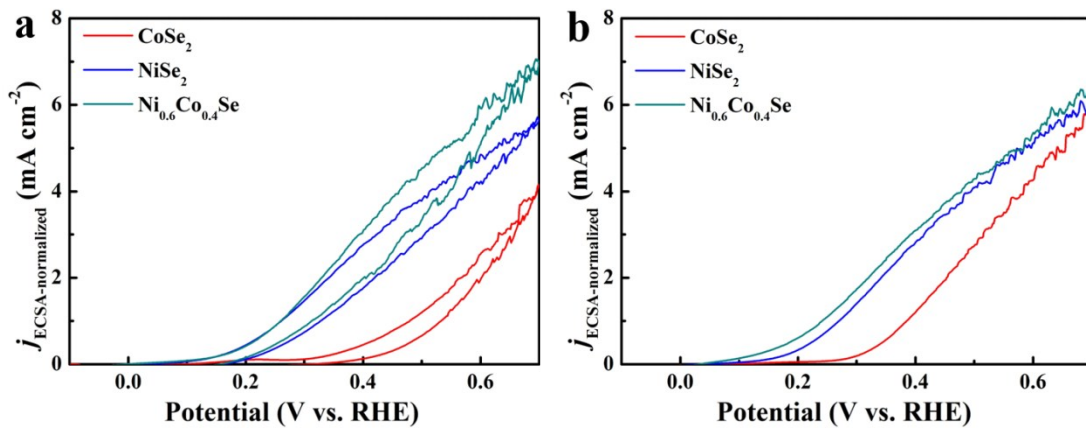

**Fig. S4** a) CV plots and b) LSV plots of CoSe<sub>2</sub>, NiSe<sub>2</sub> and Ni<sub>0.6</sub>Co<sub>0.4</sub>Se after averaged by ECSA

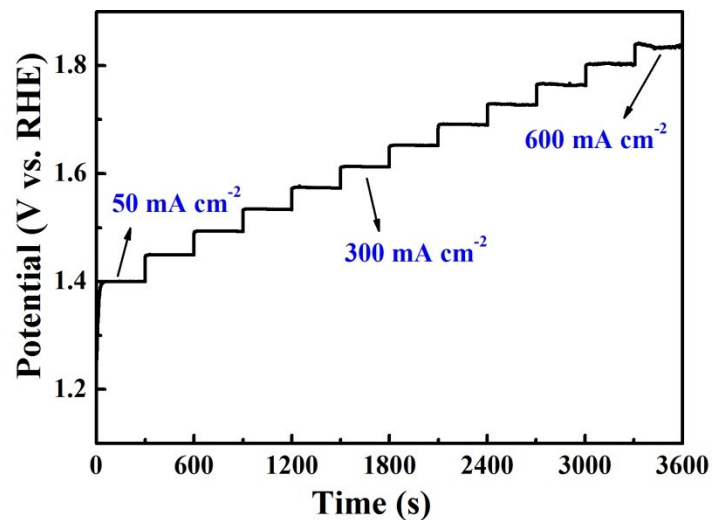

**Fig. S5** Multi-current process of  $\text{Ni}_{0.6}\text{Co}_{0.4}\text{Se}$  in 1.0 M KOH electrolyte.

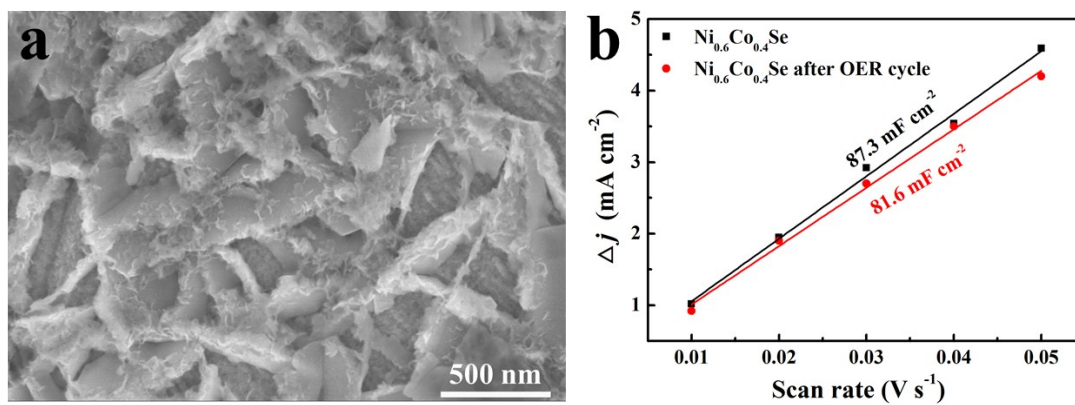

**Fig. S6 a)** SEM image of used  $\text{Ni}_{0.6}\text{Co}_{0.4}\text{Se}$  after OER cycles in 1.0 M KOH at  $10 \text{ mA cm}^{-2}$  for 24 h, **b)** capacitive current densities of fresh and used  $\text{Ni}_{0.6}\text{Co}_{0.4}\text{Se}$  after OER cycles as a function of scan rate ( $\Delta j = |j_a - j_c|/2$ ).

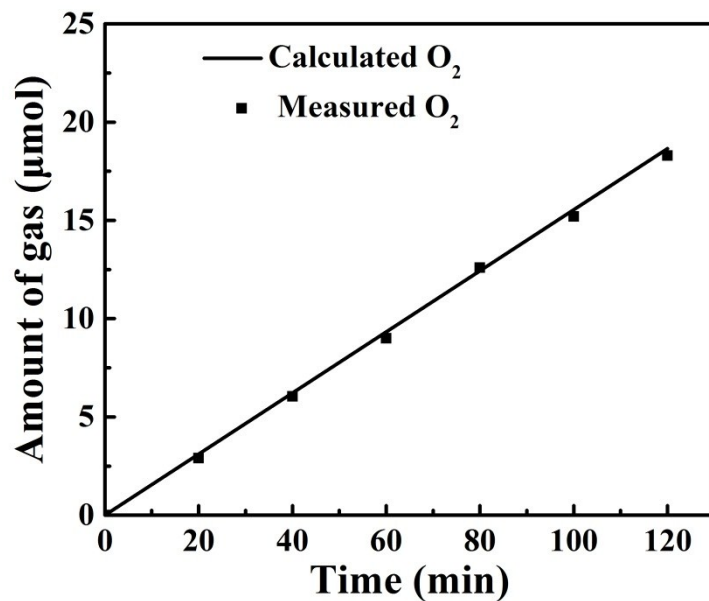

**Fig. S7** Amount of experimental and theoretical O<sub>2</sub> evolution by Ni<sub>0.6</sub>Co<sub>0.4</sub>Se at a constant oxidation current density of 1 mA.

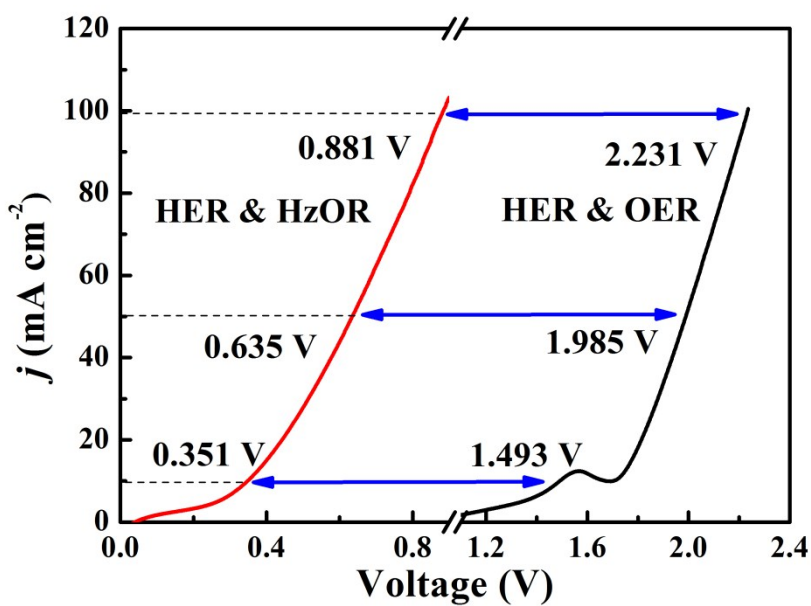

**Fig. S8** Comparison of cell voltages from LSV plots of overall and hybrid water electrolysis for Ni<sub>0.6</sub>Co<sub>0.4</sub>Se couple in two-electrode cell at a scan rate of 5 mV s<sup>-1</sup>

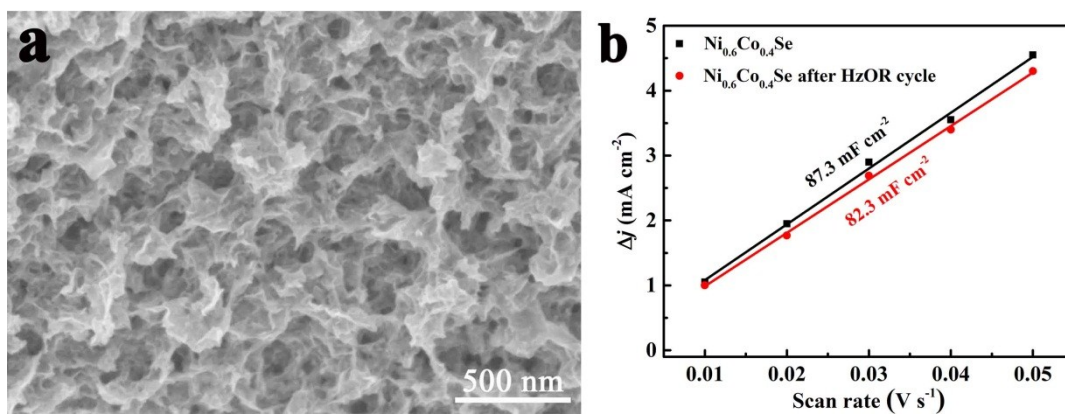

**Fig. S9 a)** SEM images of used  $\text{Ni}_{0.6}\text{Co}_{0.4}\text{Se}$  after HzOR cycle in 1.0 M KOH with 3.0 M  $\text{N}_2\text{H}_4 \cdot \text{H}_2\text{O}$  at  $200 \text{ mA cm}^{-2}$  for 20000 s, **b)** capacitive current densities of fresh and used  $\text{Ni}_{0.6}\text{Co}_{0.4}\text{Se}$  after HzOR cycles as a function of scan rate ( $\Delta j = |j_a - j_c|/2$ ).

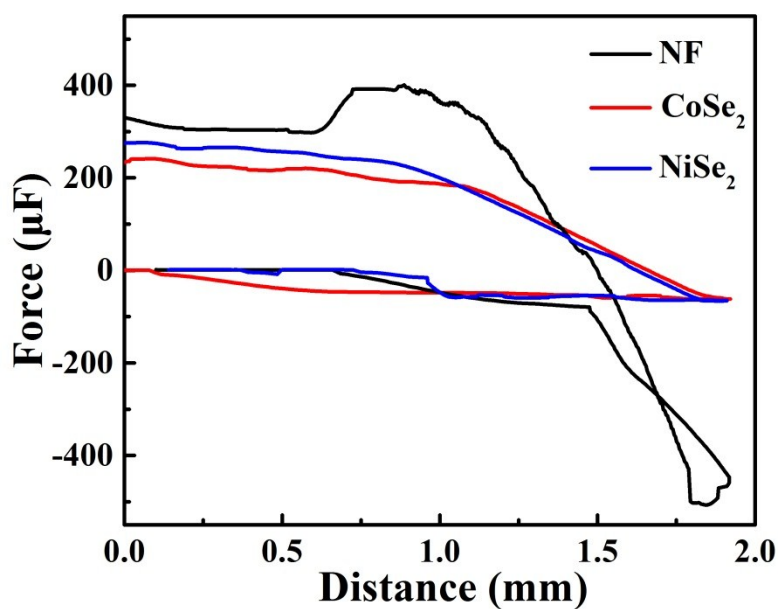

**Fig. S10 a)** Adhesive force measurements of the gas bubbles on NF,  $\text{CoSe}_2$  and  $\text{NiSe}_2$  surface

**Table S1.** Comparison of OER performance of Ni<sub>0.6</sub>Co<sub>0.4</sub>Se with other non-noble metal-based electrocatalysts.

| Catalysts                                                  | Current density<br>(mA cm <sup>-2</sup> ) | Overpotential<br>(mV) | Tafel slope<br>(mV dec <sup>-1</sup> ) | Ref.                 |
|------------------------------------------------------------|-------------------------------------------|-----------------------|----------------------------------------|----------------------|
| (Ni,Co)Se <sub>2</sub> /CC                                 | 10                                        | 256                   | 74                                     | [S1]                 |
| CoSe <sub>2</sub> /CC                                      | 10                                        | 297                   | 41                                     | [S2]                 |
| (Ni,Co) <sub>0.85</sub> Se/NF                              | 20                                        | 287                   | 87                                     | [S3]                 |
| EG/Co <sub>0.85</sub> Se/NiFe-LDH                          | 10                                        | 250                   | 57                                     | [S4]                 |
| NiCoSe <sub>2</sub> /NF                                    | 10                                        | 274                   | 61                                     | [S5]                 |
| Co(S <sub>0.22</sub> Se <sub>0.78</sub> ) <sub>2</sub> /CF | 10                                        | 270                   | 65.6                                   | [S6]                 |
| Ni <sub>5</sub> P <sub>4</sub> /Ni foil                    | 10                                        | 290                   | 40                                     | [S7]                 |
| Co <sub>3</sub> O <sub>4</sub> @MoS <sub>2</sub>           | 10                                        | 269                   | 58.9                                   | [S8]                 |
| <b>Ni<sub>0.6</sub>Co<sub>0.4</sub>Se/NF</b>               | <b>10</b>                                 | <b>249</b>            | <b>53</b>                              | <b>This<br/>work</b> |

**Table S2.** Comparison of HzOR performance of Ni<sub>0.6</sub>Co<sub>0.4</sub>Se with other non-noble metal-based electrocatalysts.

| samples                                      | electrolyte                                                       | j (mA cm <sup>-2</sup> ) | E (V vs. RHE) | Onset Potential (V) | Ref.             |
|----------------------------------------------|-------------------------------------------------------------------|--------------------------|---------------|---------------------|------------------|
| NiCoSe <sub>2</sub> /NF                      | 0.5 M KOH, 0.1 M N <sub>2</sub> H <sub>4</sub> ·H <sub>2</sub> O  | 40                       | 0.6           | 0.15                | [S9]             |
| Ni <sub>3</sub> Se <sub>4</sub> /NF          | 1.0 M KOH, 0.5 M N <sub>2</sub> H <sub>4</sub> ·H <sub>2</sub> O  | 75                       | 0.4           | 0.15                | [S10]            |
| CoSe <sub>2</sub>                            | 1.0 M KOH, 0.1 M N <sub>2</sub> H <sub>4</sub> ·H <sub>2</sub> O  | 120                      | 0.4           | 0.025               | [S11]            |
| NiS/NF                                       | 1.0 M KOH, 0.02 M N <sub>2</sub> H <sub>4</sub> ·H <sub>2</sub> O | 125                      | 0.4           | 0.1                 | [S12]            |
| NiFeP/NM                                     | 1.0 M KOH, 0.5 M N <sub>2</sub> H <sub>4</sub> ·H <sub>2</sub> O  | 200                      | 0.3           | 0.00                | [S13]            |
| <b>Ni<sub>0.6</sub>Co<sub>0.4</sub>Se/NF</b> | <b>1.0 M KOH, 0.1 M N<sub>2</sub>H<sub>4</sub>·H<sub>2</sub>O</b> | <b>300</b>               | <b>0.4</b>    | <b>0.025</b>        | <b>This work</b> |

## References

- S1 W. Song, X. Teng, Y. Liu, J. Wang, Y. Niu, X. He and Z. Chen, *Nanoscale*, 2019, **11**, 6401-6409.
- S2 C. Sun, Q. Dong, J. Yang, Z. Dai, J. Lin, P. Chen and X. Dong, *Nano Res.*, 2016, **9**, 2234-2243.
- S3 K. Xiao, L. Zhou, M. Shao and M. Wei, *J. Mater. Chem. A*, 2018, **6**, 7585-7591.



- S4 Y. Hou, M. R. Lohe, J. Zhang, S. Liu, X. Zhuang and X. Feng, *Energ. Environ. Sci.*, 2016, **9**, 478-483.
- S5 H. Zhu, R. Jiang, X. Chen, Y. Chen, and L. Wang, *Sci. Bull.*, 2017, **62**, 1373-1379.
- S6 L. Fang, W. Li, Y. Guan, Y. Feng, H. Zhang, S. Wang and Y. Wang, *Adv. Funct. Mater.*, 2017, **27**, 1701008.
- S7 M. Ledendecker, S. Krick Calderón, C. Papp, H. P. Steinrück, M. Antonietti and M. Shalom, *Angew. Chem. Int. Edit.*, 2015, **54**, 12361-12365.
- S8 J. Liu, J. Wang, B. Zhang, Y. Ruan, H. Wan, X. Ji and J. Jiang, *J. Mater. Chem. A*, 2018, **6**, 2067-2072.
- S9 K. Akbar, J. H. Jeon, M. Kim, J. Jeong, Y. Yi and S. H. Chun, *ACS Sustain. Chem. Eng.*, 2018, **6**, 7735-7742.
- S10 J. Y. Zhang, X. Tian, T. He, S. Zaman, M. Miao, Y. Yan and B. Y. Xia, *J. Mater. Chem. A*, 2018, **6**, 15653-15658.
- S11 B. Y. Xia, J. Y. Zhang, H. Wang, Y. Tian, Y. Yan, Q. Xue and Y. Chen, *Angew. Chem. Int. Ed.*, 2018, **130**, 7775-7779.
- S12 G. Liu, Z. Sun, X. Zhang, H. Wang, G. Wang, X. Wu and H. Zhao, *J. Mater. Chem. A*, 2018, **6**, 19201-19209.
- S13 Q. Sun, M. Zhou, Y. Shen, L. Wang, Y. Ma, Y. Li and C. Zhao, *J. Catal.*, 2019, **373**, 180-189.
